# Supplementary material for: Synthesis and adhesion performance of polyacrylate-clay pressure-sensitive adhesive as nanocomposite by in-situ polymerization
Source: Royal Society of Chemistry journal article supplement (doi:10.1039/d2cp01325h), 2009-01-01
Supplement: d2cp01325h1.pdf [file d2cp01325h1.pdf]

*Supporting Information for*  
**Effect of Side-Chain  $\pi$ - $\pi$  Stacking on the Thermal Conductivity Switching in Azobenzene  
Polymers: A Molecular Dynamics Simulation Study**

Xingfei Wei <sup>1,\*</sup> and Tengfei Luo <sup>1,2,\*</sup>

<sup>1</sup>Department of Aerospace and Mechanical Engineering, University of Notre Dame, Notre Dame, IN 46556.

<sup>2</sup>Department of Chemical and Biomolecular Engineering, University of Notre Dame, Notre Dame, IN 46556

\*Correspondence to: [xwei20@jhu.edu](mailto:xwei20@jhu.edu) and [tluo@nd.edu](mailto:tluo@nd.edu)

**Table S1.** Force field parameters related to the -N=N- connection.

| <b>Lennard-Jones Potential</b> |  | $\epsilon$ (kcal/mol) |                   | $\sigma$ (Å)     |                   |                  |                   |
|--------------------------------|--|-----------------------|-------------------|------------------|-------------------|------------------|-------------------|
| Nitrogen (N)                   |  | 0.062                 |                   | 4.121            |                   |                  |                   |
| Aromatic carbon (CP)           |  | 0.064                 |                   | 4.010            |                   |                  |                   |
| <b>Bond Stretching</b>         |  | $r_0$ (Å)             | $K_2$ (kcal/mol)  | $K_3$ (kcal/mol) | $K_4$ (kcal/mol)  |                  |                   |
| N=N                            |  | 1.26                  | 1400              | 0.0              | 0.0               |                  |                   |
| N-CP                           |  | 1.43                  | 720               | 0.0              | 0.0               |                  |                   |
| <b>Angle Bending</b>           |  | $\theta_0$ (degree)   | $K_2$ (kcal/mol)  | $K_3$ (kcal/mol) | $K_4$ (kcal/mol)  |                  |                   |
| CP-CP-N                        |  | 120                   | 560               | 0.0              | 0.0               |                  |                   |
| CP-N-N                         |  | 116.5                 | 650               | 0.0              | 0.0               |                  |                   |
| <b>Dihedral Torsion</b>        |  | $K_1$ (kcal/mol)      | $\phi_1$ (degree) | $K_2$ (kcal/mol) | $\phi_2$ (degree) | $K_3$ (kcal/mol) | $\phi_3$ (degree) |
| CP-CP-CP-N                     |  | 0.0                   | 0.0               | 4.8498           | 0.0               | 0.0              | 0.0               |
| H-CP-CP-N                      |  | 0.0                   | 0.0               | 1.7234           | 0.0               | 0.0              | 0.0               |
| CP-CP-N-N                      |  | -0.6333               | 0.0               | 10.1932          | 0.0               | 0.6              | 0.0               |
| CP-N-N-CP                      |  | 8.3667                | 0.0               | 1.1932           | 180               | 0.0              | 0.0               |
| <b>Improper Torsion</b>        |  | $K$ (kcal/mol)        |                   |                  | $\chi_0$ (degree) |                  |                   |
| CP-CP-CP-N                     |  | 13.0421               |                   |                  | 0.0               |                  |                   |

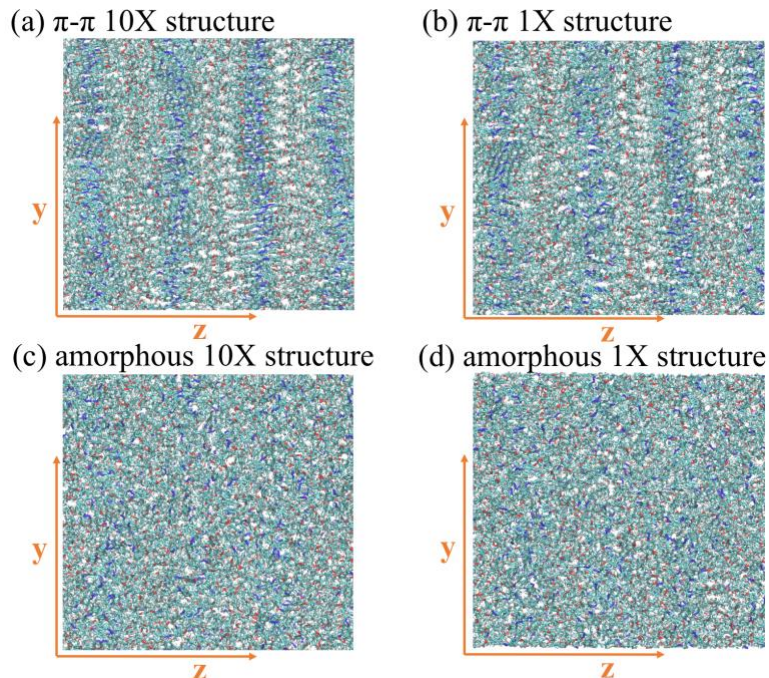

**Figure S1.** Polymer morphologies of (a, b)  $\pi$ - $\pi$  stacking structures and (c, d) amorphous structures with different LJ parameter strengths, (a, c) 10X and (b, d) 1X.

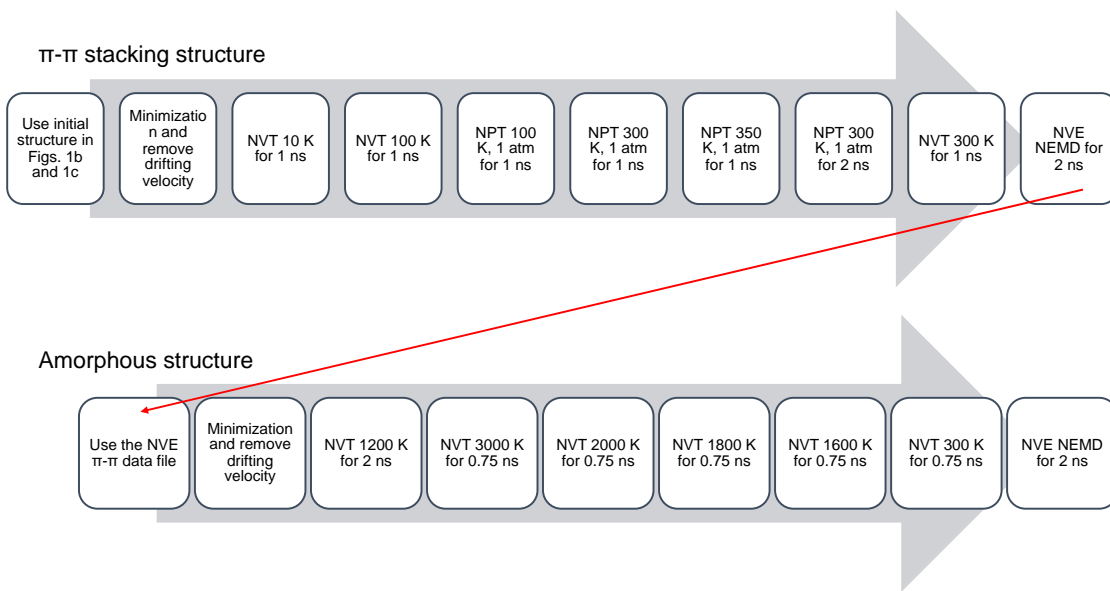

**Scheme S1.** Simulation procedure for relaxing the polymer model and thermal conductivity calculations.

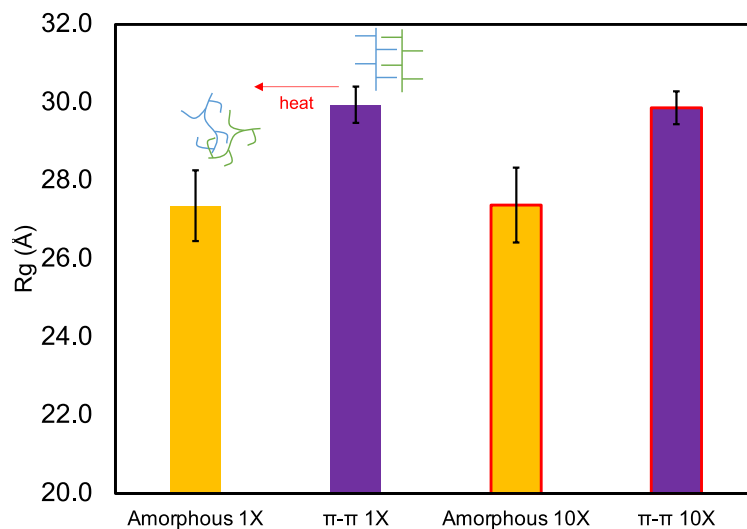

**Figure S2.** Polymer radius of gyration ( $R_g$ ) comparison between the 4 polymer models: amorphous 1X vs amorphous 1X, and  $\pi$ - $\pi$  10X vs amorphous 10X.

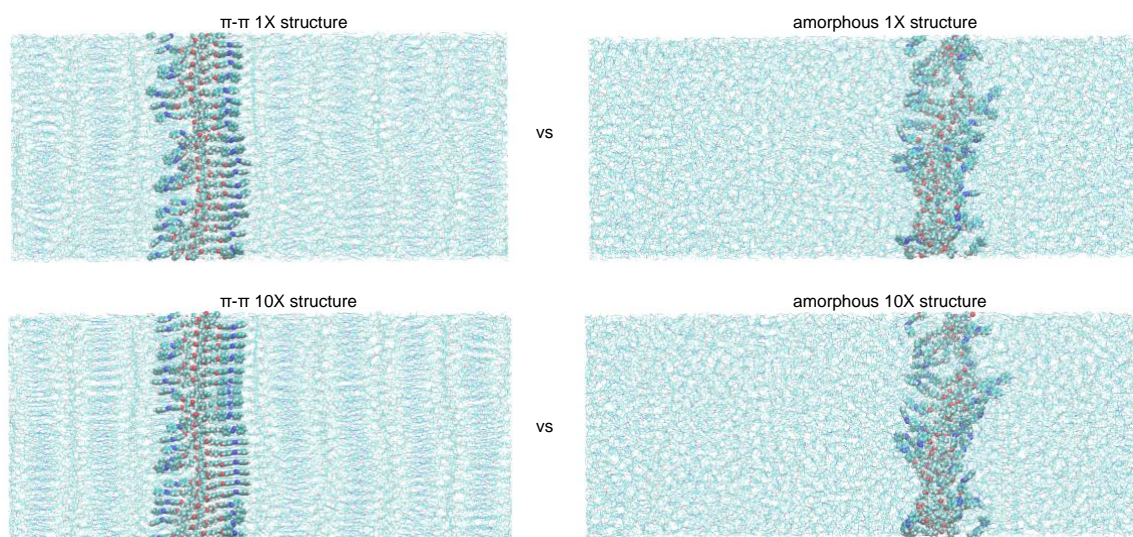

**Figure S3.** Comparison of polymer schemes:  $\pi$ - $\pi$  1X vs amorphous 1X, and  $\pi$ - $\pi$  10X vs amorphous 10X. In the amorphous structures, the side-chains are more entangled, but the polymer backbone conformations are similar to those of the  $\pi$ - $\pi$  stacking structures.

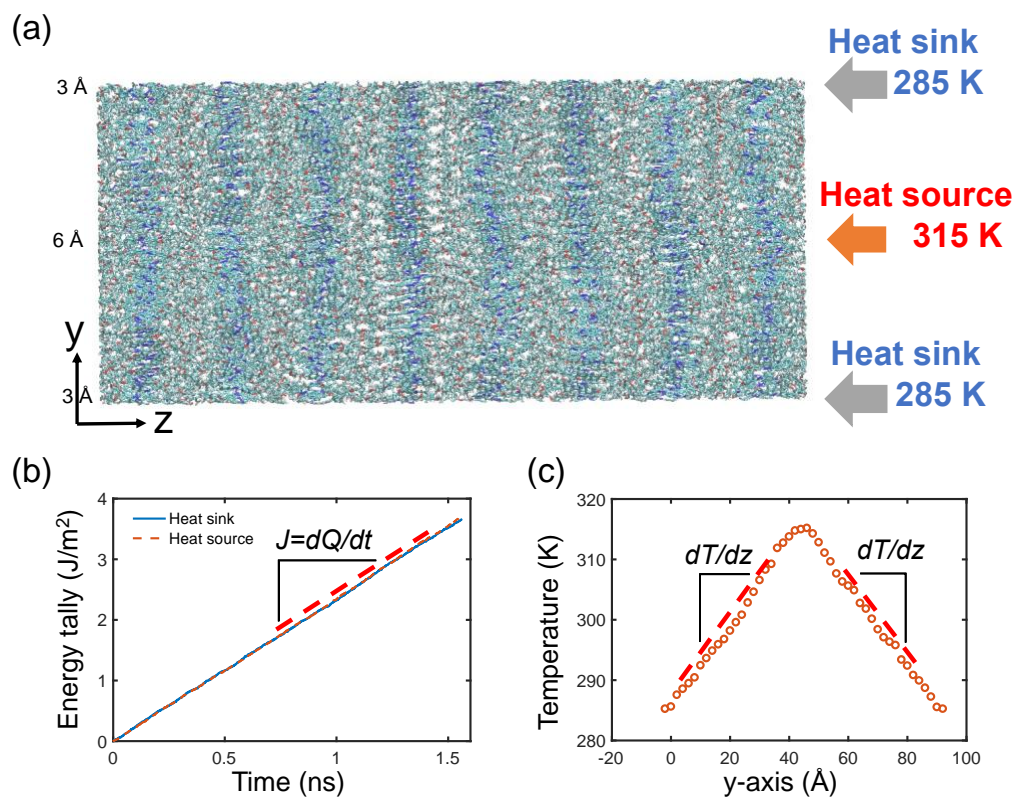

**Figure S4.** NEMD method for calculating thermal conductivity in the y-axis. (a) Scheme of the simulation model. (b) Heat flux calculation. (c) Temperature gradient calculation.
